# Supplementary material for: Evaluation of Calcium Alginate-Based Biopolymers as Potential Component of Membranes for Recovering Biosurfactants from Corn Steep Water
Source: MDPI journal article supplement (doi:10.3390/w13172396), 2021-08-31
Supplement: s1 [file s1]

**Supplementary material**  
**for**  
**Evaluation of calcium alginate-based biopolymers as potential component of**  
**membranes for recovering biosurfactants from corn steep water**

A. Martínez-Arcos<sup>1</sup>, M. Reig<sup>2</sup>, J.M. Cruz<sup>1</sup>, J.L. Cortina<sup>2,3</sup>, A.B. Moldes<sup>1</sup>, X. Vecino<sup>1\*</sup>

<sup>1</sup>Chemical Engineering Department, School of Industrial Engineering – CINTECX,  
University of Vigo, Campus As Lagoas-Marcosende, 36310 Vigo, Spain.

<sup>2</sup>Chemical Engineering Department, Escola d'Enginyeria de Barcelona Est – Barcelona  
Research Center for Multiscale Science and Engineering, Universitat Politècnica de  
Catalunya, Campus Diagonal-Besòs, 08930 Barcelona, Spain.

<sup>3</sup>CETaqua, Carretera d'Esplugues, 75, 08940 Cornellà de Llobregat, Spain.

*\*Corresponding author: xanel.vecino@uvigo.es; phone: (+34) 986130190.*

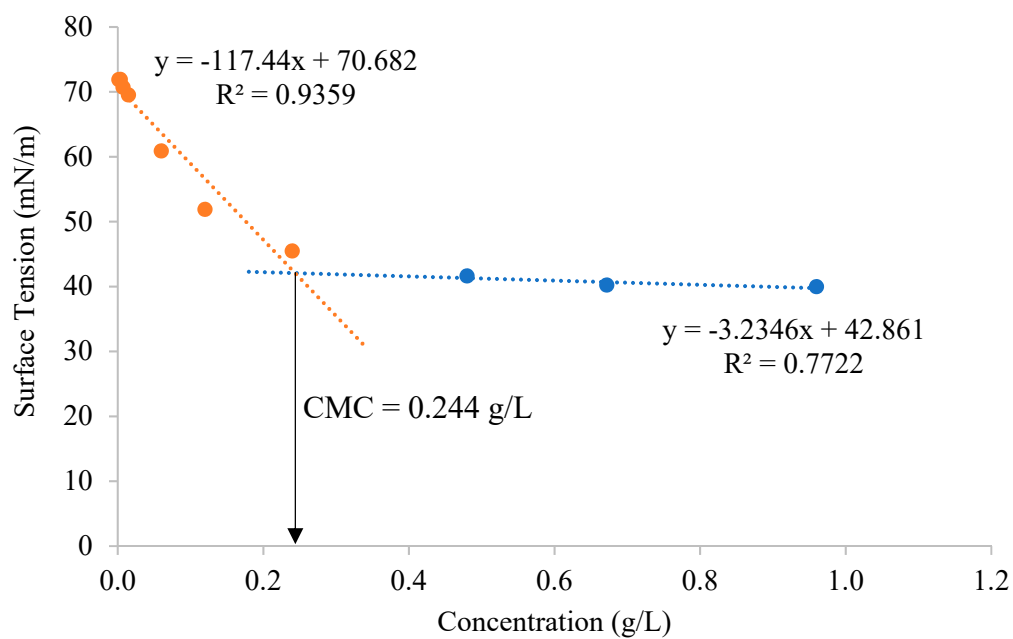

**Figure S1.** Critical micellar concentration (CMC) of biosurfactant extract obtained from corn steep water after liquid-liquid extraction with chloroform.
